# Supplementary material
Source: PubMed Central journal article supplement (PMC3737326)
Supplement: rna-10-687-s01.pdf [file rna-10-687-s01.pdf]

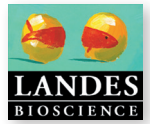

## **Supplemental Material to:**

**Fei Cai, Seth D. Axen and Cheryl A. Kerfeld**

**Evidence for the widespread distribution of  
CRISPR-Cas system in the Phylum Cyanobacteria**

**2013; 10(5)**

**<http://dx.doi.org/10.4161/rna.24537>**

**[www.landesbioscience.com/journals/rnabiology/article/24571/](http://www.landesbioscience.com/journals/rnabiology/article/24571/)**

# A

## Normalized Locus Counts by Subsection

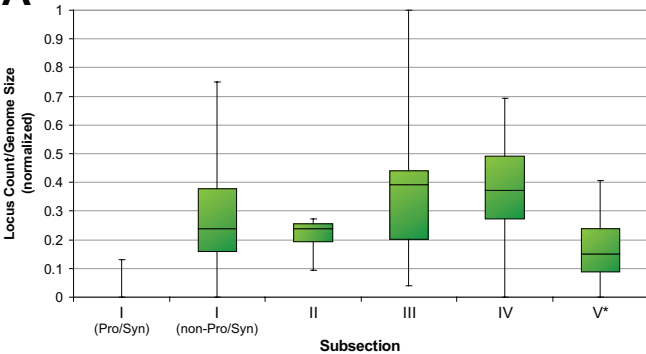

# B

## Normalized Spacer Counts by Subsection

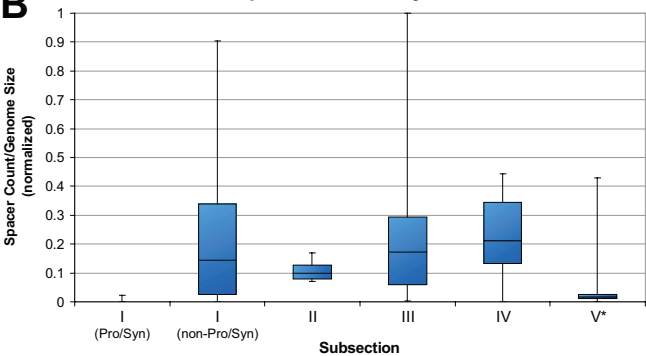





| Cluster |
|---------|
| 1       |
| 2       |
| 3       |
| 4       |
| 5       |
| 6       |
| 7       |
| 8       |
| 9       |
| 10      |
| 11      |
| 12      |
| 13      |
| 14      |
| 15      |
| 16      |
| 17      |
| 18      |
| 19      |
| 20      |
| 21      |
| 22      |
| 23      |
| 24      |
| 25      |
| 26      |
| 27      |
| 28      |
| 29      |
| 30      |
| 31      |
| 32      |
| 33      |
| 34      |
| 35      |
| 36      |
| 37      |
| 38      |
| 39      |
| 40      |
| 41      |
| 42      |
| 43      |
| 44      |
| 45      |
| 46      |
| 47      |
| 48      |
| 49      |
| 50      |

|     |
|-----|
| 51  |
| 52  |
| 53  |
| 54  |
| 55  |
| 56  |
| 57  |
| 58  |
| 59  |
| 60  |
| 61  |
| 62  |
| 63  |
| 64  |
| 65  |
| 66  |
| 67  |
| 68  |
| 69  |
| 70  |
| 71  |
| 72  |
| 73  |
| 74  |
| 75  |
| 76  |
| 77  |
| 78  |
| 79  |
| 80  |
| 81  |
| 82  |
| 83  |
| 84  |
| 85  |
| 86  |
| 87  |
| 88  |
| 89  |
| 90  |
| 91  |
| 92  |
| 93  |
| 94  |
| 95  |
| 96  |
| 97  |
| 98  |
| 99  |
| 100 |
| 101 |
| 102 |
| 103 |

|     |
|-----|
| 104 |
| 105 |
| 106 |
| 107 |
| 108 |
| 109 |
| 110 |
| 111 |
| 112 |
| 113 |
| 114 |
| 115 |
| 116 |
| 117 |
| 118 |
| 119 |
| 120 |
| 121 |
| 122 |
| 123 |
| 124 |
| 125 |
| 126 |
| 127 |
| 128 |
| 129 |
| 130 |
| 131 |
| 132 |
| 133 |
| 134 |
| 135 |
| 136 |
| 137 |
| 138 |
| 139 |
| 140 |
| 141 |
| 142 |
| 143 |
| 144 |
| 145 |
| 146 |
| 147 |
| 148 |
| 149 |
| 150 |
| 151 |
| 152 |
| 153 |
| 154 |
| 155 |
| 156 |

|     |
|-----|
| 157 |
| 158 |
| 159 |
| 160 |
| 161 |
| 162 |
| 163 |
| 164 |
| 165 |
| 166 |
| 167 |
| 168 |
| 169 |
| 170 |
| 171 |
| 172 |
| 173 |
| 174 |
| 175 |
| 176 |
| 177 |
| 178 |
| 179 |
| 180 |
| 181 |
| 182 |
| 183 |
| 184 |
| 185 |
| 186 |
| 187 |
| 188 |
| 189 |
| 190 |
| 191 |
| 192 |
| 193 |
| 194 |
| 195 |
| 196 |
| 197 |
| 198 |
| 199 |
| 200 |
| 201 |
| 202 |
| 203 |
| 204 |
| 205 |
| 206 |
| 207 |
| 208 |
| 209 |



|     |
|-----|
| 210 |
| 211 |
| 212 |
| 213 |
| 214 |
| 215 |
| 216 |
| 217 |
| 218 |
| 219 |
| 220 |
| 221 |
| 222 |
| 223 |
| 224 |
| 225 |
| 226 |
| 227 |
| 228 |
| 229 |
| 230 |
| 231 |
| 232 |
| 233 |
| 234 |
| 235 |
| 236 |
| 237 |
| 238 |
| 239 |
| 240 |
| 241 |
| 242 |
| 243 |
| 244 |
| 245 |
| 246 |
| 247 |
| 248 |
| 249 |
| 250 |
| 251 |
| 252 |
| 253 |
| 254 |
| 255 |
| 256 |
| 257 |
| 258 |
| 259 |
| 260 |
| 261 |
| 262 |

|     |
|-----|
| 263 |
| 264 |
| 265 |
| 266 |
| 267 |
| 268 |
| 269 |
| 270 |
| 271 |
| 272 |
| 273 |
| 274 |
| 275 |
| 276 |
| 277 |
| 278 |
| 279 |
| 280 |
| 281 |
| 282 |
| 283 |
| 284 |
| 285 |
| 286 |
| 287 |
| 288 |
| 289 |
| 290 |
| 291 |
| 292 |
| 293 |
| 294 |
| 295 |
| 296 |
| 297 |
| 298 |
| 299 |
| 300 |
| 301 |
| 302 |
| 303 |
| 304 |
| 305 |
| 306 |
| 307 |
| 308 |
| 309 |
| 310 |
| 311 |
| 312 |
| 313 |
| 314 |
| 315 |

|     |
|-----|
| 316 |
| 317 |
| 318 |
| 319 |
| 320 |
| 321 |
| 322 |
| 323 |
| 324 |
| 325 |
| 326 |
| 327 |
| 328 |
| 329 |
| 330 |
| 331 |
| 332 |
| 333 |
| 334 |
| 335 |
| 336 |
| 337 |
| 338 |
| 339 |
| 340 |
| 341 |
| 342 |
| 343 |
| 344 |
| 345 |
| 346 |
| 347 |
| 348 |
| 349 |
| 350 |
| 351 |
| 352 |
| 353 |
| 354 |
| 355 |
| 356 |
| 357 |
| 358 |
| 359 |
| 360 |
| 361 |
| 362 |
| 363 |
| 364 |
| 365 |
| 366 |
| 367 |
| 368 |

|     |
|-----|
| 369 |
| 370 |
| 371 |
| 372 |
| 373 |
| 374 |
| 375 |
| 376 |
| 377 |
| 378 |
| 379 |
| 380 |
| 381 |
| 382 |
| 383 |
| 384 |
| 385 |
| 386 |
| 387 |
| 388 |
| 389 |
| 390 |
| 391 |
| 392 |
| 393 |
| 394 |
| 395 |
| 396 |
| 397 |
| 398 |
| 399 |
| 400 |
| 401 |
| 402 |
| 403 |
| 404 |
| 405 |
| 406 |
| 407 |
| 408 |
| 409 |

### Consensus Sequence

GUCC AAC CCUACC AAUCCCCGUCAGGGGACGGAAAC  
GUUUCAAUCCCUAAUAGGGAUUUUGAGGAAUUGCAAC  
GUUUCCA AUUUC UAGGGAUCCCCCGAAGGGGGAAC  
AUUGCAAUCCCAAUAAGCACUAUUAGAAAUUGAA AC  
GUUUCAAUCCCAUUACUAGGAUUCAUUAAAAAGAAAC  
GCCGCAAUUAACCAAUCCCUAU UAG GAUUGAAAC  
GCUUCA CCCC AAAACCCUUUUAGAG AUUGAAAC  
CUUUAAACUUCUUUGAAAGUUAACGUAUGGAAAC  
GUUGCAACUCAAUUAUCCCUAUUAGGGAUUGAAAC  
GUUUCCAACA AUUCCAUUUAAC CCAAUAGGU AGGG  
GCCCGCU UCCCUCUGGGAAGUGGAU AUUGGAAAC  
GUUUCCAUCCCGUGAGGGGUAAGGAAUUA AAC  
GUCACAACCAACCACUUC CCCUCACGGGGAUUGAAAC  
GUUUCCGUCCCUUGCGGGGAAAAGGUAGGGAUCAAC  
GC CCAACCAUCCGAUUA AACCCAAUCAGUAG AC  
GUUCCUCUUAAUAGGGGACUAAAUUGAAUGGAAAC  
GUUUCCA AUUCAAUAGGAUCCCGAGCGAGUGGGGAU  
GUUUCAGUCCCUUGCGGGGUAUUGGGUUUGAAAG  
GUUUCAAUCCCUUACCCCGCAAAAAACGGAAAC  
CUCCCACUCGCUUGGGGAAACUAAUUGAAUGG AAAC  
GUUUCAAUCCCUAAUAGGGAGUAAUAGAAAUUGCAAU  
GUUGAAAUCAA CUUAAAUCCCUAUCAGGGAUUGAAAC  
GUUUCAAUCCCUUGAAGGGAUUUUUAUUGGGUUUCAAC  
GUUUCAAUCCCUAGAAGGGAUUUUUGGGUUUUUCAAC  
GUUCCA AUUAUCUUA AACCCU AUUAGGGAUUGAAAC  
GUUUAAA UUCACUUA AUCCCUAUCAGGGAUUGAAAC  
GUCGAAAUCCUCUAUA AUCCCUAUCAGGGAUUGAAAC  
GUUCCACUCGCUUGGGGAUUAUUAUUGAAUGGAAAC  
CC CCACCGAUUGGGUUAUUCGGAUUA GUUGGAAAC  
GUUUCCA AUUAUCCACUUC CUAGAAG AAAGCGGAC  
CUUUAAACUUCUUCGGAAGUUGAAUUAUUGGAAAC  
GUUUCCAUCCCGUGAGGGGUAAGAGAUUAAAAAC  
CUUGCUUCCA AUUCGUGAAGCGUAUGAAUGGAAAC  
GUUUCCAUCCCGUGAGGGGUAU UAAUUGAAAC  
AAGCCCAACUACGAACCUUUGGGCUGAAGCCCAACUACGAACCUUUGGGCU  
CUUUCCGCGAACUUA AUCCCGCAAGGGGACUGAAA A  
AA UGCAAUUCAAACUAAUCCCUAUUAGGGAUUGAAAC  
GUUUCAAUCCCUUGAUAGGGUUUUAAGGUUGUUUCCGGC  
GCCGCAAUC CUAACACCCAAUCAGG AAUUGAAAC  
GUCA CCUACC AUUCCCGCAAGG GGACGG AAAC  
GUUUCAAUACA CUAACCCCCACAA GGAGACCGAAAC  
AUUGCAAUUUUAUUA AUCCCUAUUAGGGAUUGAAAC  
GUUUCAACUACCAUCCCGACUAGGGGUGGGUUGAAAG  
CUUGAAAUAGGCUAUA AUUGCCUAUGAGGUUAUUGAAAC  
GUUGAAAUACCGAAUAAGCACUAUAAAGCAUUGAAAC  
GUUUCAAUUCU CAUAGGAAUUAUUAUAGUUUAAC  
CCCGCAAACCAAAGCCCGACAAGGGGACGGAAAC  
GUUUCAAUCCCUAAUAGGGAUUAAGUGAAAUUCAAC  
GUUCCAUC ACUGAAAGCCAUAUAAGG AAUUGAAAC  
GUUCCUAUAACUAAAAUCCCUAUCAGGGAUUGAAAC

|                                                      |
|------------------------------------------------------|
| UAUGGCCUAACCUUUGAUGCCGUAAGGCGUUGAUCAC                |
| GUUUCAAUCCCUAAGAGGUAAUAAUAAGAGUUUAAAC                |
| GUUUCGUCCCCUACGGGGUAAAUGUGGAAAUCAAC                  |
| GUUUCAAUA_CCUAAGAACGGACUAGG_GAUUGAAAC                |
| GUUUCAAUCCCUAGAGAGGGUUUGGGGGGGGUUGGAGC               |
| CCAGCGCCCAGCCUCCAGGCUGGGUGAGGAUUGGAAC                |
| GUUUCAAU_UAACAAAAUCCCUAUCAG_UUAAAAAC                 |
| GUUGCAACACCACAUAAUCCCUAAUAGGGAUUGAAAC                |
| GUUAAAACCCCGAAAAGCACUAUAAAGGAUUGAAAC                 |
| GUUUCUAUUAACACAAAUCCCUAUCAGGGAUUGAAAC                |
| CUUUCAAUCCAAUG_GCCAGG_UAACGAAUAGAAAC                 |
| CUUUCAAC_CCAUCCCAACAGGAAUGG_GUUGAAAC                 |
| GUUGCAAU_UAACAAAGAAUCCCUAUGA_AUUGAAAC                |
| GUUUCAAUCUCCUAGGAGAUAAAGUCUAAAUUUGAAC                |
| GUUACAAUC_CCUAAAACCCAAUCAGG_AAUUGAAAC                |
| CUUUCAA_CCCAAUAAAGACCUAAUAAAG_UUGAAAC                |
| GUGCGAUUACCUUUGAUGCCGUAAGGCGUUGAGCA_C                |
| CUUUCAAUACA_UCCCGGCA_ACGGGAAUGAAAC                   |
| GUCCCAAUGACCUCUAAUCCCUUUCAGGGAUUGAAAC                |
| GCGAAAACCCACCAAACCCCUUAGGGAUUGAAAC                   |
| AUUGCAAC_CCCUACCCCGCAAAGGA_ACUGAAAC                  |
| CUUUACAA_CCACUCCCGCAAGGGGA_UGGAAAC                   |
| GUUUCCAAUCAGGUGAUUUCCCAAGGUGUGGGAAAG                 |
| GUUUCCAAUUUUCGAAUUAACCCAAUCGGUGGGG                   |
| GUCUCCAAUCAUUGAAGACC_CC_AGCGAGUGGAAAC                |
| GUUUCCAUUCAACUAAGUUCUCUUAUAAAAAGAGAG                 |
| GUCACUUCUAUUCUGAGAAGUGGAAUUAUUGGAAAC                 |
| GUGCCCAACCUUAGAUGCCAUAAGGCGUUGAUCAC                  |
| GUUUCCAAUCUUCGAAUUAACCCAUUCGGUAGGG                   |
| CUUCCACUCAUUGAGAAAUCCAAGCGAAUGGAAAC                  |
| GUCCCUACUUGUAGGGAAUCAAUUGAAUGGAAAC                   |
| CCCU_AACUUAUCCGAUAAAAACCAAUAGGU_AAAC                 |
| CUUUCCAUCCUAGGAGCAACCUAAUAAAAGGAAAAC                 |
| CUUUCCAUU_AACAGAGGACACCAGCU_AAGGGAAAC                |
| GUCGCA_ACCUACGCAAGAAGGAAAAGGU_CAAGAC                 |
| CUUUCAGUACCC_UUGCCCCGAAA_GAGGAAGGAAAC                |
| GUGAUUAAACCUUUGAUGCCGUAAGGCGUUGAGCAC                 |
| GUUUCCAUUCAACUUGUUUCCAGCGAGUGGGAAAG                  |
| GUUUCCAUCCCGCUGAGGGGAGUUGGUUUGGAAAG                  |
| CUCUAUCUUUUGUAGAGAAACUAAUUGAAUGGAAAC                 |
| GUGCUCACGCCUACGGCAUCUAAAGGUAGAGGAAC                  |
| GUUUCCAAUCAAUUAGUUUCCUGUGAAGGAAAAG                   |
| GUUUCCAUUCAACUAGGUUCUCCGUUAAGAGAAAG                  |
| GUUUCGUCCCCUUGCGGGGUAAUGGAUUUUGAAC                   |
| CUUUCACUCAG_GAGAAAACUA_CAAAAGAAAAC                   |
| GUUUCA_CCCUUAACAAAGAGAAAAGG_UCAAAC                   |
| GC_ACGGUCACCACGGCCCCGAAAACCGC_CC                     |
| CGGUUCACCCACGGGUGUGGGGACAAC                          |
| GCGCCCCACACUGCGCCCCACAG                              |
| ACCCUUCGAACAGCAGCCGAGAGUUUGGGACGCAUCGGUGCGGGGAACGAGA |
| CACCGACCAUUAUAAUAAACCCGCCCUUCACCGACCAUUAUAAUAAAC     |
| CGGUCAAAGUCUUUGAUGGCUUGGUCAUAAUGCUCCAUCACUGAUAAAGU   |
| GUAGGCGGGCUUCGUCUGUAUAGCCGCAUUUCCAUCGCCAGGAACCU      |

|                                                  |
|--------------------------------------------------|
| UAGGGCUAAGGUAUCUUUGUGGGUCUUUGUAACCUUGAACUAACUGUU |
| GUAGUUGGGCUUUAGCCCAAAGGUUUGUAGUUGGGCUUUAGCCCAA   |
| CUACCAAGACCUAGGAAACAACAAGCAGCCGUAGAAGAUUAUAC     |
| AGUUGGGCUUUAGCCCCAGUGUUUGUAGUUGGGCUUUAGCCC       |
| CCUUUCAACCCACCUCUAGCCGGGAUUGGUUGUUGAAACU         |
| GGUUCGCAGUUGGGCUUCAGCCCAAAGGUUCGCAGUUGG          |
| AUCAAGACCUUUAGCAAUCAGCAGUUCUACCAUCUCUUU          |
| AGUUUCAAUCCCUAAUAGGGAUUUUAGUUAGUUUCAACU          |
| UAUUACAACCCUCACCAGCCCCGAAAGGCUGAUGUCAC           |
| GUUUCAAUGACCAUCCACGUUGGGGAUGGAUUGAAAGA           |
| CAACAAUUAUUACAUAUACUCAGCAACAAUUCGAACC            |
| AGUCUGAAUUCCAUUAUAAUCCCUAUCAGGGAUUGAAAC          |
| CUUUCAACCCUCCCAUUAUCUGGAAGGAGGGUUGCAACG          |
| AGUUUCAUCAACCCUCCUGAUGUGGGGAUGGGUUGAAAG          |
| CCCUACCUAUUGGGUUAUUAGGAAUAGUUGGAAACGA            |
| GUUUCGUCCCCUUGCGGGGAAUUGGUAGGGUUGGAC             |
| CUUUCAACCCGCCCCACUCCGGGAGGGGUGUUGAAAC            |
| GUUUCAGUCCCUUGCGGGGAUUUUUUUUUGGAAAC              |
| GUUUCAAUCCCUAAUAGGGAUUUUUUGAAAUUCAAC             |
| GUCUCCACUAACCAUGUGGAGGCGCCUUAUUGAAAC             |
| GUUUCAAUCCCUAAUAGGGAUUUUUGAUAGUUUAAAC            |
| CUUUAAAUAUUACGAAUCCCGUCUUCGGGACUGAAAC            |
| AUUGCAAUAUUAAAUAUCCCUUUAAGGGAUUGAAAC             |
| GUUUAAACUUUAAAUAUCCCUUUAUAGGGAUUGAAAC            |
| AUUACA AUUUUCAUUUACUCCCUAAUAGGGAUUGAAAC          |
| AUUACA AUUUUCUUAUUACUCCCUAAUAGGGAUUGAAAC         |
| GUUUAAAUGCACCUAUUUCCCUUUUAGGGAUUGAAAC            |
| GCGAAAUAAGCUAAUAAUCCCUUUUAGGGAUUGAAAC            |
| GUUUCGUCCCCUUGCGGGGAAAAGAUAGUAUCUGAC             |
| GUUCCA AUCCUCGAUCAACCCGAAAGCCGAUCGCUAC           |
| GUUUCAAUCCCUAAUAGGGCGUUAUUAAAUAUCAAC             |
| GUUUCAAUCCCUAGAGAGGGUUCAGCGUAAUUGCAAC            |
| GUUUCAAUCCCUAAUAGGCAUUAUACA UUAUUUCAAG           |
| GUUUCAAUACCUCAUAGGCAUUAUAGGUGAUUUUCAAG           |
| GUGAUCAACGCCUAACGGCGAUCUAAGGUUAACUCAC            |
| GUUUCAAUACCUAAUAGGCAUUAUAGAUCAUUUCAAG            |
| GCUUCA AUUGGAGCCACUCAUUUAGAGGGAAUUA AAC          |
| GUUUCAAUCCUCACCCAGCCCAGGAGCCGGGUGCUAC            |
| GUGAUCAACGCCUAUUAGGCGAUCUAAGGUUAUUUCAC           |
| GUUUCAAUACCUCAUAGGCAUUAUACGUUAUUUCAAG            |
| GUUGAAA UUUACCUUAAUCCCUAAUAGGGAUUGAAAC           |
| GUGGCAACAACCUUCCAGGUACUAGGUGGGUUGAAAG            |
| CUCGCGCCGACUGCGUUAAGUCGGAUUAGUUGGAAAC            |
| GUUUCCAUUAUUUCCGCUUCUAAAGAAUAGAAGCGAC            |
| GUUUCAAUCCCUAAUAGGGAUUUUAGGUAAA UUGCAAC          |
| GUCACA AUUAACUUAUUUCCCUAAUAGGGAUUGAAAC           |
| GUUUCAAUCCCGUUGCCGGGAAUCAUUUAUUUGAAAG            |
| CUUUCAAUUAUUUAGAAACCCGGCAACGGGAUUGAAAC           |
| GUUUCCAUUAUUUCAGCUUCAAGAGAAGCUUUGAAAC            |
| GGUUUCCA UUAUUUCCACUACCCAUAAGAGUAGCAAU           |
| GUUUCGUCCCCUUACGGGGUAAAUGAGGAAA UUAAC            |
| GUUUAAACUCUAAUUAUUACCUAUAAGGGAUUGAAAC            |
| GUUCGAUUC CACA UUUACCCCGUAAGGGGACGGAAC           |

|                                        |
|----------------------------------------|
| GUUUCAGUCCCCUUGCGGGGAGUUGGUUAGCGGAAAG  |
| GUUUCAAUCCCUAUAGGGAUUUUGAUGUUUGCAAG    |
| CUUUCGCUAACUAAUCCCCGCAAGGGGACUGAAAC    |
| GUUACAAUUCACCCAAAUCCCUAUCAGGGAUUGAAAC  |
| GUUUCAAUCCCUIUCGGGGUUUUGUGAGGUAGAAAC   |
| UCUUCAAAGGGGCCGCAUCUUGAGAAUGCGGUGAGAC  |
| GUUUCAAUCCCUIUCUAGGAUUCAUUAAUAGGAAAC   |
| GUUUCCGUCCCCUUGCGGGGAAAAAGUAGGGAAAAAC  |
| UUCAGAUGGGUGAGAUUGGCUAAGGGGGUGAUGUCCU  |
| CUUUCCAAUUUCCAAAUCUGGAAACGGGAUUGAAAC   |
| AUUUCAAUUACAUAUAAUCCUUAUCAGGGAUUGAAAC  |
| GUUUCAAUUUAGUCCCUICAAUAAAAGGGAUUUCUAC  |
| GUUUAAAUCCCCGAUUUUCAGGGGACUAAAUUGAAAC  |
| CUUUCAAUCGCCCCUUGCCGCAAACUGGAUGAAAC    |
| CUUUCAAUCGUUCCCAUGCCUCGAAGGGUGAGGCAAC  |
| GUCACAAAACCCUCCAAACCCUCUCAGGGAUUGAAAC  |
| GUUUCAAUCCCUGAUAGGGAUUUUAGUAAAUAUAAAC  |
| GUUCCAUAUAACAUGAAUCCCUIUAGGGAUUGAAAC   |
| GUUACUUAACCAUCACUCCCCGCAAGGGGAUGGAAAC  |
| CUUUCUUCUACUAAUCCCCGGCGAUCGGGACUGAAAC  |
| GUUCAACACCCUCUUUCCCCGUCAGGGGACUGAAAC   |
| AUUGCAAUAACUAAAUCCCUIAUCAGGGAUUGAAAC   |
| GUGACAAUAGCCCUUCCGUGUUGAGCGGGUUGAAAG   |
| CUUUCAACCCCAACACCCUCAAAAAGGACGUUGCGAC  |
| GUUUCAGUCCCGUAAUCGGGAUUUAGUGGUUGGAAAG  |
| CUUUCAACCCACCCAGUACCUGGAGGGUUGUUGCCAC  |
| GUUUCAUACAGGUUUUUGACCUCCAUUGAUUGAAAG   |
| GUUACAAUAAAUAUGAAUCCCUIUAGGGAUUGAAAC   |
| GUUUCAAUCCCUIUGCCAGGAUUCAUUAAUAAAAG    |
| GUUCCAAGCCUGAAUCCCGGUCUACGGGACUGAAAC   |
| GUUUCAAUCCCUIAUAGGGAUUAACAUAUUGGAAC    |
| CUUUCAACCUACCCCUAUCGGGAUGGCGGUUGAAAC   |
| GUUUCAAUCCCUIUCCAGGAUUCAUUAAUAGAAAG    |
| GUUUCAAUCCCUIUGCGGGAAUUUUGCUUUGGAAAG   |
| GUUUCAAUCCCUIAAUAGGGAUUAUAGGUGAUUUCGAG |
| GUUUCAAUCCCUIAAUAGGGAUUAUUGGUAUUGUAAC  |
| CUUUCACAAUAAAUCCCCGCAAGGGGACUGAAAC     |
| GUUUCAAUCCCUIAUAGGGAUUAUAGAUGAUUUCAC   |
| CUAGAAUUAACUAAUAAUACCUAUAUAGAGAUUGAAAC |
| GUUUUUAUAACCAUUCCCCCGCAAGGGGACGGAAAC   |
| CUUUCAAUCCAUIUCAUCAAAUAGAUUGCGAG       |
| GUUUCAAUCCCUGAUAGGGAUUCAGGGGAAUCCAAG   |
| GUUCCAUAUAAUUCAGCUUCCCAACAGAGUGGGAAAC  |
| GUUCCUUAUAAUGAAUCCCGGCAACGGGAUUGAAAC   |
| GUCUAAAUCCCCUGAAUCCCUIAUCAGGGAUUGAAAC  |
| GUUCCAUAUCAACUUGUUUCCCAGCGAGUGGGAAAC   |
| GUCGCAUACCCAUUCUUGGACGGGGUGGGUUGAAAG   |
| GUUUCAAUCCCUIAAUAGGGAUUAAGGUAAAUUGCAAU |
| AUUGCAAUAACACUAAUCCCUIUAGGGAUUGAAAC    |
| GUUUAAACAUCAACUAAUCCCUIUAGGGAUUGAAAC   |
| GUUGCAAUUUCUAAUAAUCCCUIAUCAGGGAUUGAAAC |
| GUUUCAAUCCCUIAAUAGGGAUUAGGUGAAGUUAAAC  |
| UUUGGGCUAAAGCCCAACUACAACUUUUGGGCUAAA   |



|                                         |
|-----------------------------------------|
| GUUUCAAUCCCGUUGCCGGGAUUCAGCUAUAGGAAAG   |
| GUCUCAAUAAACCCCUAAUCCCUUUCAGGGAUUGAAAC  |
| GCCGGAAUCAACCUAAACCCCUAUCAGGGAUUGAAAC   |
| GUUUCAAUCCCUAAUAGGGUUUUAGUUUGAUUGCGGC   |
| GCCGAAAUAACCUAAAACCCUAUCAGGGAUUGAAAC    |
| UUUGAAAAUCAACUAAUCCCUAUCAGGGAUUGAAAC    |
| GUUUCAAUCCCUAAUAGGGAUUAAGAAUGUUUGGAAU   |
| GUUUAAACUACAAUUAUUCUUAUGAGGAAUUGAAAC    |
| GUUGCACCUGGCCUUCGGGCUGGGUGAGGAUUGGAAC   |
| GUCUCCUACUCGCUAGGGGACGCGAUCGAUUGGAAU    |
| GUUUCCAACUAAUCCGACUAAUCCAGUCGGCGGAAG    |
| GUUGAAACUCACCUAAUCCCUAAUAGGGAUUGAAAC    |
| GUUGAAAUAACCUUAAUCCCUAAUAGGGAUUGAAAC    |
| GUUUCCGUCCCCUUACGGGGUAAUGGUGGAGUUUAAC   |
| GUUUCCGUCCCCUUACGGGGUAAAGAUGGAGUUUAAC   |
| AUUUCAAUUACUACAAUCCCUAUCAGGGAUUGAAAC    |
| GUCGCAAACCUUAUAAUCCCAACUACGGGACUGAAAC   |
| GUGCUGUAACCUAAGAUGUCGCAAGGCGUUGAGCAG    |
| CCUUACCGAUUGGUUUAAAUCGGAUUUAUUGAAAAC    |
| CCCUUCCA AUUGGGUCAAAUUGGAAUCAUUGGAAAC   |
| GUCCCUACUCGUUAGGGAAAUAUUGAUUGGAAAC      |
| CUUCCACUAACCAUUUCCCGUAAGGGGACGGAAAC     |
| GUUUCCGUCCCCUUGCGGGGAAAGUGGAUUCGAGAC    |
| CCUUUCCCAUUCGUUGGAAUGGAUUAGUUUGGAAAC    |
| GUUUCCAUCCCUUUGCGGGGAAAAGGUGGAAAGCAG    |
| GUGCCCAACCAUUGAUGCCGUAAGGCGUUGAGCAC     |
| CUGUACCCACCUUAGAUGCCAUAAGGCGUUAAGCAC    |
| GUGUCUUAACCUAGAUACCGUAAGGUGUUGAUCAC     |
| GUGCUC AACGCCUUGCGGCAUCAGAGGUUCGAUCGC   |
| GUGCCUACUCGCUAGGCAAAACAAUAGAUUGGAAAC    |
| GUUUCCA UUAUUCACUUCUCCGAAGAAAAGUGAC     |
| GUUUCCA UUAUUCACUACCCCGAAGGGUAGCGAC     |
| GUGAUCAACGCCUAAUGGCGAUCUGAGGUUUAAACAG   |
| CUCUCCCUAAUUGGGAGAAACUAAUUGAAUGGAAAC    |
| GUGCUC AACGCCUUGCGGCAUCAAAAGGUUUGGACAC  |
| GUGUCU AACGCCUAAUGGCGAUCGAAGGAAAUUCAC   |
| GUGUUUUAACCUUAGAUGCCACAAGGCGUUGAUCAC    |
| GUCUCU UUUCCUAAAGAGAAACUAAUUGAAUGGAAAC  |
| GUUUCCA UUCAAUUGUUUGCCCCAUCAAUGGAGAC    |
| GUUUCCA UUCAAUUAUUGCCUCUAAUAAAAGAGAC    |
| GUUUCCA UUAUAGUUCUACUCCUAAAGAAGUAAUUGGG |
| CUUUACCGAUCGACUCAGGUCGGAUAGUUUGGAAAC    |
| CUCUCUACUCGCUAGAGAAAUAUUGAAUGGAAAC      |
| GUUUCCA ACUAAUCCUAAUUGACCUAAUAGGUAAAGG  |
| GUUUACGCAAGCACUCCCCGCAAGGGGAUGGAAAC     |
| GUCGCUUUUUCUUUGGAGAAGCGGAUUAAUGGAAAC    |
| GUUUCCA UCCCUUUCGGGGUGAUGUGAUCGGAAAG    |
| GUCUCCACUCGUAGGAGAAAUAUUGAUUGGAAAC      |
| GUGUCCA AACCAUUGAUGCCGUAAGGCGUUGAGCAC   |
| GUUUCCA AUUCUAAUUGCUUCUCAGGUGAAGAGAAAC  |
| GUGAUCAACGCCUUCGGCAUCAAAAGGUUAAAGUAG    |
| GUUUCAACACCUUUUCUUCUAAUGAAAGUCGCUAC     |
| CCCUACCGCCUGGGUUAAAGCGGAUUAAGUUUGGAAAC  |

|                                       |
|---------------------------------------|
| GUCCCUACUCGCUAGGGAAACUAAUUGAAUGGAAAC  |
| GUUUCCAUAUAAUUCACUAUUCGGAAGAAUAGCGAC  |
| GUUUCCAUCCCGUUAGGGGAAGAGGUUAUGGAAAG   |
| GUUUCCAUCCCGUACGGGGAAAGGGUAAAGGAAAG   |
| GUCUUGACCUUCAUAAGAAGGAAUAGGUAAUACGAC  |
| GUGCUC AACGCCUAAUUGGCAUCAAGGUUAAACAC  |
| CUUUACAAACACACUUCGCCGCAAGGGGACGGAAAC  |
| GUUUCCAUCCCUUUCGGGGGAAGUGAGUUUGUCAAG  |
| GUUUCCAUCCCUUGCGGGGAAGUGGUUUGGAUAC    |
| GGUUUCCAUAUAAUUCGACUUCGGGGCGGAAGCCAAG |
| GUGCUC AACGCCUACGGCAUCAAGGUGUGUCCAG   |
| GUUUCAAUCCCUUCUCGGGGGAAGUGGUAAAGGAGAC |
| GUUUCAAUCCCUUGCGGGGAAAAGUGAAUUGCGAC   |
| CUCUCUAUUUAUAGAGAAAUAGUUGAAUGGAAAC    |
| CUUUACUAACCCCUAAUCCCUAAUAGGGGAUGGAAAC |
| GUGAUC AACGCCUAACGGCAUCAAGGUUAGUACAC  |
| GUCGUAGGUGUAGCGGGUAGUCCGGUUGAGUGGAUC  |
| GUUUCCAUAUCAAUUGUUUCCCUAGCGAGUAGGGAG  |
| GUUUCCAUAUCAAUAGGUUCCCUAGCGAGUAGGGAG  |
| GUUGCCAUAACGUUCGACUUCAAAGAAGUCUCAAG   |
| CUUUUAACUUCUAGAAAGUUGAACUAAUGGAAAC    |
| GUUUCCAUAUCAGGUGAUUCCCAAGGACUGGGAAAG  |
| GUUUCCAUCCCGUGAGGGGUAAUUGGUUGAAAAC    |
| GUUUCCAUCCCGUGAGGGGAAGAGGAAUUA AAAAC  |
| GUUUCAAUUUCUCUUCCCCUACCGGGGAUGGAAAC   |
| GUUUCCGUCCCCUUGCGGGGAAUGGGAGAUGAAUC   |
| GUUUCCGUCCCCUUUCGGGGUAAGGGAAUUUUGAAC  |
| GUUCAGAUUCCAUAUACCCCGAAAGGGGACGGAAAC  |
| CUUUCAUUCCAUAUACCCCGCAAGGGGACGGAAAC   |
| GUUUCAAUUCUCUUCCCCUUACCGGGGACGGAAAC   |
| GUUUCAAUUAACUUCCCCUUACCGGGGACGGAAAC   |
| UGAGCAACGCCAAUAGGCAGUAAACCAUGAUGUAC   |
| CUUUAGACUUCUCCGGAAGUCGAAUUAUUGGAAAC   |
| CUUUAGACUUCUCCUAGAAGUCGAAUUAUUGGAAAC  |
| GUUUCCAACGAGUCCGAUUUUAACUAAUCGGUAAG   |
| UCCCUUAUCCCAAAGGGGACCCCUACCUUCCCU     |
| CUUUUGAAAACCUCAAAGUCAAAUUAUUGAAAAC    |
| GUUUCCGUCCCCUUGCGGGGUAUUGGGUGUGAAAC   |
| GUUUCCGUCCCCUUGCGGGGUGUAGGCGUGAAAC    |
| GUUUCCAUCCCGUACGGGGUAAAGAUUAAAAAC     |
| GUUUCCGUCCCCGUGAAGGGGAAUUAUUA AAAAC   |
| GUUUCCAUCCCGUAAGGGGUAAGGAAUUA AAAAC   |
| CUUUCUCUUAAGUAGGAAACUAAUAGAUUGGAAAC   |
| CUUUCUCUUAAGUAGGAAAUUAUAGAAUGGAAAC    |
| CUUUUGAAAUGCUCGCCCGUCAGGGGAUGGAAAC    |
| CUUUUGAAAACCUUCGCCCGUCAGGGGAUGGAAAC   |
| GGUUUCCAUAUAAUUCUUCUUGAGGGGAGAUUG     |
| GUCAGCGGUCAGCGGUCAGCGGUCAGCCGUCAGC    |
| GUAGCCGCACCAGAAGUAGCCGCACCAGAAGUAG    |
| GUUGCAAACACCUCAUCCCUAGUAGGGAUUCAA     |
| GUUUCCGUCCCCUUGCGGGGAAUUGAUAGGAAUU    |
| AGUAACGCCUUGCGACAUCAAGCUAUA AAAUCAC   |
| UGACUUGGAUGCGGAUUCGAUGACUUGGAUGC      |

|                                   |
|-----------------------------------|
| AUCCCGUUUCCAGGAUUCGCUAAGUUUCAAGCU |
| GGCACCACUAAGAUUAGCACCACGCAGGUCAG  |
| CCACCCAGCUGGGGGAUUAGCGAAACCGACCUG |
| AUGUUUGUAGUUGGGCUUUAGCCCAAUACCCU  |
| UUAUUCGGACUCUCCAUCGGAUUCGCUGGUC   |
| UGGGGAUUGGGGAUUGGGGAUUGGGGAUUGGG  |
| CAUUGCGAAUGUAUCGGCUUACAUUGCGAAUG  |
| AUUGGACGCUCACCAUCUACAUCAAAAGUAU   |
| AUCAGCCUCCCACGAAUAGGUGGGCUGAAAG   |
| CACGCUUAACAACAGCGGCAGGCUUGACAAC   |
| AACGCCUAAUGACAUCUAAUAGUUGGGCAGU   |
| UAGCUCUAUCGCGAUUAUCCCAAUUGCUG     |
| AGUAGCCUGCCACCCGAAUUCGAAAGCUC     |
| AAUCAAAUAUCUGAUUUAGUCCCUUGAAA     |
| GUGUUGAGGUACUCAAACUUGUGUUGAGG     |
| CUUUUGAAAACCUCAAAGAUGAAUUAUUG     |
| UGUAGAUUAUCACUGUUGAGUCAUUGGUGA    |
| GUUUUCCCAUUCUUGUGGGGGUGAACCG      |
| CGGCUCACCCCCACAGGUUUGGGGACAAC     |
| CUGUAGUGAUUCCGGUCCACUCCAGAC       |
| AAAUGAAAUAUAAAUGAAAUUCUUCUAU      |
| AGUCUCCUCAAGAAGAAGCGCAACCAGAA     |
| GCUCCACUCAAGUCGGCUCACUCAAGU       |
| ACCAGCCAACUACCUACACCCGCCCCAG      |
| GCAUUUGUGAAAUUGGCAUUUUUAAGGU      |
| CGCCUCAAGCUAGGAGGCGCAUUGAAAC      |
| GCGUAGCGUGGCCAUAGGCCAAUCGCAU      |
| CCAACACCAGAACCGGUAGUAACCCCAA      |
| GGGGGAGAAAGGGAGAGGGGGAGAAAGG      |
| CUUCUAGGCGGGCGAUUGUUGCUUUUUG      |
| AGGAUCACGCCACCGUAGUGAGCAAUU       |
| UACUGUUCUGAAUCAUUGAAAUUC          |
| AGUGCUGUUGGUCGCAUUUACUGUGCC       |
| UCUCACCGAUUCUUUGCGAUCGGAUUA       |
| GAAGACCCUACGGCGACCCCGCAGAU        |
| UUAGCAUGACUGAGGUUAGCGCGGGG        |
| UAAUAAUCCCUUUUAGGGAUUGAAAC        |
| GUUUCCAUAUAAUCCAUCUAAAGUG         |
| GGUUGGUUGAAGGUUGGAGGUUGGUU        |
| AAUGCUAUUACAGAUUACACUCCUCU        |
| AACAAGAAACUUCUCGUUUCAUCCUU        |
| ACUCGGAGUUCAGGCUUUUUGCUCG         |
| AACCCAGCUAGAGGUGGGUUGAAAG         |
| AUGCUAUUCUCAAUAUGCAGAUUCU         |
| UCCCCUUGUCCCCUUGUCCCCU            |
| AGUUGAAAUCGGAUAGUUGGAAAC          |
| CCCGACAGGAUUUGAACCGCAAAA          |
| CCAAAAACAUCAUCUAAGGAAGGAG         |
| CGGUGACAUCACCUUCUCCGGCACC         |
| GUAGGUUGGGUGAAACCCAACAAAG         |
| CCACUCAAUUCAGCUUGGCUCAGAU         |
| AUCAUCGCCAGAACCGCCAUCCAGG         |
| AGGAAAUGACACCAUUGAUGGGGGU         |

|                            |
|----------------------------|
| UAUGCAAUACGCCCCUACAAGAAAC  |
| UCUUAACGGCAAUGAUGGAAAUGA   |
| ACUUCCCCCACCUUGUCACCUUGUCA |
| CACAAACCCCACCACCUCCAUCUG   |
| AAGCUACCAUCAGUUGGGAUGCCA   |
| UAGAGCAGCUAGCAAAAGAUGAAA   |
| UGGUAAGGGUAUUUAUAAAUUUGC   |
| GGUGCUGUAAAACUAUUGCAUUGU   |
| AUUUGCGCCGCGUAAAUCCGCCCC   |
| GCCUGAAGCGGAAUUAUUGGAAAC   |
| ACCACCAUCGAGGAUGUCAUCGCC   |
| UUCUGAUUCCGGCAGCAGUGAUUC   |
| UUUGGGCUAAAGCCCAACUGCGAA   |
| GUUUGUAGUUGGGCUAAAGCCCAA   |
| UUGGGCUAAAGCCCAACUACAAAC   |
| CGGCACAGACACCACACCCGGUGG   |
| CGUGUCCCCCUUCCCGUGUCCCC    |
| GCCUCGGCUUUGGAUUCGGCAAAG   |
| UAGCUAAAAGAAGUAGCAUUUCCC   |
| GUAGUGAUUAGGAAGAUAUACUCA   |
| GGGUUCUAGUGUAUUUUGUAAUCA   |
| GUGCUUUCAGGAGAUGGUGUUGU    |
| GACAUUCCCACACCCGGACAUGGU   |
| ACUCAAAUCAGCCCCACUCAAAU    |
| GAAGAAACCGUCGCCGAAGAAUC    |
| GAAUUUCCGGAGACUGUGGAGUU    |
| CUUUUCCCUGGUGGCUGGUGGCA    |
| AACUAUGACAGCAGCACGCUGAA    |
| AUCGGCACCCCCCUUAUCAAGGG    |
| UCAUUACCCGCUCCACCGUUGAG    |
| AAUCAACUGACAACUUUACCCCC    |
| GUCAAUAUGGCGGGUUUACGUCC    |
| AAAGCUCUUGCAACUGGGUGAGG    |
| CUUCCCCCAGAAAUUGGGCAACU    |
| GGAAGAGAGGAAGAGAGGAAGAG    |
| UCAUCGCCGCGAUCGCCAAAUAG    |
| GAGGUUGUCUCAAUUGUCGGAU     |
| UGCUCUCCUGCUCCUCCUGCUCCC   |
| AUAGCCAGAAAAUUCUUGAUAU     |
| AACUGGCCCAGGAGAAAGCGGCA    |
| UCUUUUAACCCGCCUAAAGCUU     |

| Number of Sequences in Cluster | Number of Organisms with Cluster | Structure Predicted as Stem-loop | Rfam Hit |
|--------------------------------|----------------------------------|----------------------------------|----------|
| 8                              | 2                                | yes                              |          |
| 8                              | 2                                | no                               | RF01318  |
| 7                              | 2                                | yes                              | RF01371  |
| 6                              | 3                                | no                               |          |
| 6                              | 2                                | no                               |          |
| 6                              | 2                                | yes                              |          |
| 6                              | 1                                | yes                              |          |
| 6                              | 3                                | no                               |          |
| 5                              | 2                                | yes                              | RF01365  |
| 5                              | 1                                | yes                              |          |
| 5                              | 1                                | yes                              |          |
| 5                              | 2                                | yes                              | RF01347  |
| 4                              | 1                                | yes                              | RF01347  |
| 4                              | 2                                | yes                              | RF01370  |
| 4                              | 2                                | yes                              |          |
| 4                              | 1                                | yes                              |          |
| 3                              | 3                                | yes                              |          |
| 3                              | 2                                | yes                              | RF01318  |
| 3                              | 2                                | yes                              | RF01318  |
| 3                              | 1                                | yes                              | RF01318  |
| 3                              | 1                                | yes                              | RF01318  |
| 3                              | 2                                | yes                              | RF01318  |
| 3                              | 1                                | yes                              | RF01318  |
| 3                              | 1                                | yes                              | RF01318  |
| 3                              | 3                                | yes                              |          |
| 3                              | 2                                | yes                              |          |
| 3                              | 1                                | no                               |          |
| 3                              | 2                                | no                               |          |
| 3                              | 3                                | yes                              | RF01347  |
| 3                              | 1                                | yes                              |          |
| 3                              | 1                                | yes                              | RF01347  |
| 2                              | 1                                | yes                              |          |
| 2                              | 1                                | yes                              | RF01365  |
| 2                              | 1                                | yes                              | RF01318  |
| 2                              | 2                                | yes                              |          |
| 2                              | 2                                | yes                              |          |
| 2                              | 1                                | yes                              |          |
| 2                              | 1                                | yes                              |          |
| 2                              | 2                                | yes                              | RF01318  |
| 2                              | 2                                | yes                              | RF01329  |
| 2                              | 1                                | yes                              | RF01318  |
| 2                              | 1                                | yes                              |          |
| 2                              | 2                                | yes                              | RF01318  |
| 2                              | 1                                | yes                              |          |
| 2                              | 2                                | yes                              | RF01318  |
| 2                              | 1                                | yes                              |          |
| 2                              | 1                                | yes                              | RF01318  |

|   |   |     |         |
|---|---|-----|---------|
| 2 | 2 | yes | RF01343 |
| 2 | 1 | yes | RF01318 |
| 2 | 1 | yes | RF01370 |
| 2 | 1 | yes |         |
| 2 | 1 | yes |         |
| 2 | 1 | yes | RF01340 |
| 2 | 2 | yes |         |
| 2 | 2 | yes | RF01318 |
| 2 | 2 | yes |         |
| 2 | 2 | yes | RF01318 |
| 2 | 1 | yes |         |
| 2 | 2 | yes |         |
| 2 | 2 | yes |         |
| 2 | 1 | yes | RF01343 |
| 2 | 1 | yes |         |
| 2 | 1 | yes | RF01318 |
| 2 | 1 | no  |         |
| 2 | 1 | yes |         |
| 2 | 2 | yes |         |
| 2 | 1 | yes |         |
| 2 | 1 | yes | RF01343 |
| 2 | 1 | yes |         |
| 2 | 2 | yes |         |
| 2 | 1 | yes |         |
| 2 | 2 | yes |         |
| 2 | 2 | yes | RF01343 |
| 2 | 1 | yes |         |
| 2 | 1 | yes |         |
| 2 | 1 | yes |         |
| 2 | 1 | yes | RF01343 |
| 2 | 1 | yes |         |
| 2 | 2 | yes |         |
| 2 | 1 | yes | RF01347 |
| 2 | 1 | no  |         |
| 2 | 2 | yes |         |
| 1 | 1 | yes |         |

|   |   |     |         |
|---|---|-----|---------|
| 1 | 1 | yes |         |
| 1 | 1 | yes |         |
| 1 | 1 | no  |         |
| 1 | 1 | yes |         |
| 1 | 1 | yes | RF01329 |
| 1 | 1 | yes |         |
| 1 | 1 | yes |         |
| 1 | 1 | yes | RF01318 |
| 1 | 1 | yes |         |
| 1 | 1 | yes |         |
| 1 | 1 | no  |         |
| 1 | 1 | yes | RF01318 |
| 1 | 1 | yes |         |
| 1 | 1 | yes |         |
| 1 | 1 | yes |         |
| 1 | 1 | yes | RF01370 |
| 1 | 1 | yes |         |
| 1 | 1 | yes | RF01365 |
| 1 | 1 | yes | RF01318 |
| 1 | 1 | yes |         |
| 1 | 1 | yes | RF01318 |
| 1 | 1 | yes | RF01365 |
| 1 | 1 | yes | RF01318 |
| 1 | 1 | yes | RF01318 |
| 1 | 1 | yes | RF01318 |
| 1 | 1 | yes |         |
| 1 | 1 | yes | RF01318 |
| 1 | 1 | yes | RF01318 |
| 1 | 1 | yes | RF01370 |
| 1 | 1 | yes | RF01322 |
| 1 | 1 | yes | RF01342 |
| 1 | 1 | yes |         |
| 1 | 1 | yes | RF01318 |
| 1 | 1 | yes | RF01318 |
| 1 | 1 | yes | RF01343 |
| 1 | 1 | yes | RF01318 |
| 1 | 1 | yes |         |
| 1 | 1 | yes | RF01340 |
| 1 | 1 | yes |         |
| 1 | 1 | yes | RF01318 |
| 1 | 1 | yes | RF01318 |
| 1 | 1 | yes | RF01329 |
| 1 | 1 | yes |         |
| 1 | 1 | yes |         |
| 1 | 1 | yes | RF01318 |
| 1 | 1 | yes | RF01318 |
| 1 | 1 | yes |         |
| 1 | 1 | yes | RF01318 |
| 1 | 1 | yes |         |

|   |   |     |         |
|---|---|-----|---------|
| 1 | 1 | yes | RF01365 |
| 1 | 1 | yes | RF01318 |
| 1 | 1 | yes | RF01365 |
| 1 | 1 | yes | RF01318 |
| 1 | 1 | yes |         |
| 1 | 1 | yes |         |
| 1 | 1 | yes |         |
| 1 | 1 | yes | RF01347 |
| 1 | 1 | yes |         |
| 1 | 1 | yes | RF01359 |
| 1 | 1 | yes | RF01318 |
| 1 | 1 | yes |         |
| 1 | 1 | yes | RF01342 |
| 1 | 1 | yes |         |
| 1 | 1 | yes |         |
| 1 | 1 | yes |         |
| 1 | 1 | yes | RF01318 |
| 1 | 1 | yes | RF01318 |
| 1 | 1 | yes | RF01370 |
| 1 | 1 | yes | RF01365 |
| 1 | 1 | yes |         |
| 1 | 1 | yes | RF01318 |
| 1 | 1 | yes |         |
| 1 | 1 | yes |         |
| 1 | 1 | yes | RF01365 |
| 1 | 1 | yes | RF01329 |
| 1 | 1 | yes |         |
| 1 | 1 | yes | RF01318 |
| 1 | 1 | yes |         |
| 1 | 1 | yes |         |
| 1 | 1 | yes | RF01318 |
| 1 | 1 | yes |         |
| 1 | 1 | yes |         |
| 1 | 1 | yes | RF01318 |
| 1 | 1 | yes | RF01318 |
| 1 | 1 | yes |         |
| 1 | 1 | yes | RF01318 |
| 1 | 1 | yes |         |
| 1 | 1 | yes | RF01347 |
| 1 | 1 | yes |         |
| 1 | 1 | yes | RF01318 |
| 1 | 1 | yes |         |
| 1 | 1 | yes | RF01365 |
| 1 | 1 | yes | RF01318 |
| 1 | 1 | yes |         |
| 1 | 1 | yes |         |
| 1 | 1 | yes | RF01318 |
| 1 | 1 | yes | RF01318 |
| 1 | 1 | yes | RF01365 |
| 1 | 1 | yes | RF01365 |
| 1 | 1 | yes | RF01365 |
| 1 | 1 | yes |         |









|   |   |     |  |
|---|---|-----|--|
| 1 | 1 | yes |  |
| 1 | 1 | no  |  |
| 1 | 1 | no  |  |
| 1 | 1 | no  |  |
| 1 | 1 | yes |  |
| 1 | 1 | yes |  |
| 1 | 1 | no  |  |
| 1 | 1 | yes |  |
| 1 | 1 | no  |  |
| 1 | 1 | yes |  |
| 1 | 1 | no  |  |
| 1 | 1 | no  |  |
| 1 | 1 | yes |  |
| 1 | 1 | no  |  |
| 1 | 1 | no  |  |
| 1 | 1 | yes |  |
| 1 | 1 | yes |  |
| 1 | 1 | yes |  |
| 1 | 1 | no  |  |
| 1 | 1 | yes |  |
| 1 | 1 | no  |  |
| 1 | 1 | yes |  |
| 1 | 1 | no  |  |
| 1 | 1 | no  |  |

refseq\_genomic

| NCBI GI   | Domain   | Top Hit Genome Name/Scaffold                                                    | Cyanobacterium Genome Name                                                                       |
|-----------|----------|---------------------------------------------------------------------------------|--------------------------------------------------------------------------------------------------|
| 256374160 | Bacteria | <i>Actinosynnema mirum</i> DSM 43827 chromosome                                 | <i>Synechocystis</i> sp. PCC 6308                                                                |
| 211593993 | Bacteria | <i>Aurantimonas manganoxydans</i> SI85-9A1 scf_1099451004081 genomic scaffold   | <i>Oscillatoria</i> sp. PCC 10802                                                                |
| #####     | Bacteria | <i>Burkholderiales</i> bacterium JOSHI_001 chromosome                           | <i>Synechococcus</i> sp. PCC 7002 plasmid pAQ6<br><i>Synechococcus</i> sp. PCC 7002 plasmid pAQ6 |
| 403048614 | Bacteria | <i>Clostridium</i> sp. JC122 JC122T genomic scaffold, scaffold00001             | <i>Spirulina</i> sp. PCC 9445                                                                    |
| 134093294 | Bacteria | <i>Herminiimonas arsenicoxydans</i> chromosome                                  | <i>Pleurocapsa</i> sp. PCC 7327                                                                  |
| 148283997 | Bacteria | <i>Orientia tsutsugamushi</i> str. Boryong                                      | <i>Crinalium epipsammum</i> PCC 9333                                                             |
| 319785620 | Bacteria | <i>Pseudoxanthomonas suwonensis</i> 11-1 chromosome                             | <i>Microchaete</i> sp. PCC 7126                                                                  |
| 323356407 | Bacteria | <i>Streptococcus vestibularis</i> ATCC 49124 genomic scaffold SCAFFOLD1         | <i>Arthrospira platensis</i> NIES-39                                                             |
| 313846893 | Eukarya  | <i>Anolis carolinensis</i> unplaced genomic scaffold, AnoCar2.0 chrUn0294       | <i>Calothrix</i> sp. PCC 7507                                                                    |
| 347611422 | Eukarya  | <i>Oreochromis niloticus</i> unplaced genomic scaffold, Orenil1.0 scaffold00079 | <i>Microcystis aeruginosa</i> PCC 7806                                                           |
| 302809162 | Eukarya  | <i>Selaginella moellendorffii</i> unplaced genomic scaffold SELMOscaffold_72    | <i>Calothrix</i> sp. PCC 6303                                                                    |
| 115304338 | Viruses  | Phormidium phage Pf-WMP4                                                        | <i>Leptolyngbya</i> sp. PCC 6306                                                                 |

env\_nt

| NCBI GI   | Domain     | Top Hit Genome Name/Scaffold                          | Cyanobacterium Genome Name                                                                                                                       |
|-----------|------------|-------------------------------------------------------|--------------------------------------------------------------------------------------------------------------------------------------------------|
| 197449997 | Metagenome | Freshwater sediment metagenome lwFormate_BCIX11460_g1 | <i>Synechococcus</i> sp. PCC 7002 plasmid pAQ6<br><i>Synechococcus</i> sp. PCC 7002 plasmid pAQ6                                                 |
| 341908879 | Metagenome | Hot springs metagenome ctg3753                        | <i>Synechococcus</i> sp. JA-2-3B'a(2-13)                                                                                                         |
| 341907640 | Metagenome | Hot springs metagenome ctg5361                        | <i>Synechococcus</i> sp. JA-3-3Ab                                                                                                                |
| 341906534 | Metagenome | Hot springs metagenome ctg6698                        | <i>Synechococcus</i> sp. JA-3-3Ab                                                                                                                |
| 341913414 | Metagenome | Hot springs metagenome ctg6942                        | <i>Synechococcus</i> sp. JA-2-3B'a(2-13)                                                                                                         |
| 341913397 | Metagenome | Hot springs metagenome ctg7937                        | <i>Synechococcus</i> sp. JA-3-3Ab<br><i>Synechococcus</i> sp. JA-3-3Ab<br><i>Synechococcus</i> sp. JA-3-3Ab<br><i>Synechococcus</i> sp. JA-3-3Ab |
| 341905256 | Metagenome | Hot springs metagenome ctg8228                        | <i>Synechococcus</i> sp. JA-3-3Ab                                                                                                                |
| 131104569 | Metagenome | Marine metagenome ctg_1101667016826                   | <i>Calothrix</i> sp. PCC 6303                                                                                                                    |
| 59978746  | Metagenome | Metagenome 2662324_fasta.screen.Contig29817           | <i>Nostoc</i> sp. PCC 7120                                                                                                                       |
| 188050466 | Metagenome | Microbial mat metagenome hsmat01_BHWG1956_x1          | <i>Coleofasciculus chthonoplastes</i> PCC 7420 scf_1103659003789                                                                                 |

| 188042672  | Metagenome            | Microbial mat metagenome hsmat01_BHWG6877_x1                                                                       | <i>Coleofasciculus chthonoplastes</i> PCC 7420 scf_1103659003816 |
|------------|-----------------------|--------------------------------------------------------------------------------------------------------------------|------------------------------------------------------------------|
| 188042671  | Metagenome            | Microbial mat metagenome hsmat01_BHWG6877_y1                                                                       | <i>Coleofasciculus chthonoplastes</i> PCC 7420 scf_1103659003816 |
| 188058376  | Metagenome            | Microbial mat metagenome hsmat02_BHWH11547_x1                                                                      | <i>Coleofasciculus chthonoplastes</i> PCC 7420 scf_1103659003816 |
| 188058375  | Metagenome            | Microbial mat metagenome hsmat02_BHWH11547_y1                                                                      | <i>Coleofasciculus chthonoplastes</i> PCC 7420 scf_1103659003816 |
| 188053976  | Metagenome            | Microbial mat metagenome hsmat02_BHWH14320_y1                                                                      | <i>Coleofasciculus chthonoplastes</i> PCC 7420 scf_1103659003782 |
| 188063308  | Metagenome            | Microbial mat metagenome hsmat02_BHWH5666_y1                                                                       | <i>Geitlerinema</i> sp. PCC 7105                                 |
| 188076061  | Metagenome            |                                                                                                                    | <i>Coleofasciculus chthonoplastes</i> PCC 7420 scf_1103659003816 |
| 188071483  | Metagenome            | Microbial mat metagenome hsmat03_BHWI3562_y1                                                                       | <i>Cylindrospermopsis raciborskii</i> CS-505 CS505_72            |
| 188067028  | Metagenome            | Microbial mat metagenome hsmat03_BHWI6525_x1                                                                       | <i>Oscillatoria</i> sp. PCC 10802                                |
| 364558569  | Metagenome            | Microbial mat metagenome MIS-Os_c1758                                                                              | <i>Nostoc</i> sp. PCC 7107                                       |
| 364557817  | Metagenome            | Microbial mat metagenome MIS-Ph1_c587                                                                              | <i>Tolypothrix</i> sp. PCC 9009                                  |
| 364547818  | Metagenome            | Microbial mat metagenome MIS-Unclassified_c11216                                                                   | <i>Oscillatoria</i> sp. PCC 10802                                |
| 364553671  | Metagenome            | Microbial mat metagenome MIS-Unclassified_c5315                                                                    | <i>Microchaete</i> sp. PCC 7126                                  |
| 179808362  | Metagenome            | Stromatolite metagenome 54426327                                                                                   | <i>Leptolyngbya</i> sp. PCC 7104                                 |
| 179861119  | Metagenome            | Stromatolite metagenome 54461039                                                                                   | <i>Cylindrospermopsis raciborskii</i> CS-505 CS505_72            |
| 179831165  | Metagenome            | Stromatolite metagenome 54481267                                                                                   | <i>Cyanothece</i> sp. PCC 7425 plasmid pP742501                  |
| 179800342  | Metagenome            | Stromatolite metagenome 54481595                                                                                   | <i>Fischerella</i> sp. JSC-11                                    |
| <b>gss</b> |                       |                                                                                                                    |                                                                  |
| NCBI GI    | Domain                | Top Hit Genome Name/Scaffold                                                                                       | Cyanobacterium Genome Name                                       |
| 315353639  | Bacteria (uncultured) | 1099893297741 M60 Mushroom Spring microbial mat library uncultured bacterium genomic clone MSU/Amplicon M60B005J21 | <i>Synechococcus</i> sp. JA-3-3Ab                                |

|           |                          |                                                                                                                             |                                  |
|-----------|--------------------------|-----------------------------------------------------------------------------------------------------------------------------|----------------------------------|
| 315341500 | Bacteria<br>(uncultured) | 1119065707113 M60 Mushroom<br>Spring microbial mat library<br>uncultured bacterium genomic clone<br>MSU/Amplicon M60B455A17 | <i>Geitlerinema</i> sp. PCC 7105 |
| 329032525 | Eukarya                  | P.MONODON-F2514E07.xg Tiger<br>shrimp fosmid genomic library                                                                | <i>Calothrix</i> sp. PCC 6303    |

**cyanobacterial plasmids**

| <b>Scaffold<br/>Accession</b> | <b>Domain</b> | <b>Top Hit Genome Name/Scaffold</b>                    | <b>Cyanobacterium Genome Name</b>                 |
|-------------------------------|---------------|--------------------------------------------------------|---------------------------------------------------|
| NC_009928                     | Bacteria      | <i>Acaryochloris marina</i> MBIC11017<br>plasmid pREB3 | <i>Fischerella</i> sp. JSC-11                     |
| NC_007412                     | Bacteria      | <i>Anabaena variabilis</i> ATCC 29413<br>plasmid C     | <i>Nostoc</i> sp. PCC 7524                        |
| NC_011880                     | Bacteria      | <i>Cyanothece</i> sp. PCC 7425 plasmid<br>pP742501     | <i>Nostoc</i> sp. PCC 7107                        |
| NC_011885                     | Bacteria      | <i>Cyanothece</i> sp. PCC 7425 plasmid<br>pP742502     | <i>Nostoc</i> sp. PCC 7107                        |
| NC_014533                     | Bacteria      | <i>Cyanothece</i> sp. PCC 7822 plasmid<br>Cy782201     | <i>Coleofasciculus chthonoplastes</i><br>PCC 7420 |
| NC_014533                     | Bacteria      |                                                        | <i>Leptolyngbya</i> sp. PCC 7104                  |
| NC_013160                     | Bacteria      | <i>Cyanothece</i> sp. PCC 8802 plasmid<br>pP880201     | <i>Cyanothece</i> sp. PCC 8801                    |
| NC_010630                     | Bacteria      | <i>Nostoc punctiforme</i> PCC 73102                    | <i>Calothrix</i> sp. PCC 7103                     |
| NC_010630                     | Bacteria      | plasmid pNPUN03                                        | <i>Calothrix</i> sp. PCC 7507                     |
| NC_003276                     | Bacteria      | <i>Nostoc</i> sp. PCC 7120 plasmid<br>pCC7120alpha     | <i>Tolypothrix</i> sp. PCC 9009                   |

| Spacer Name                          | ID (%) | E-value |
|--------------------------------------|--------|---------|
| Syn6308DRAFT_JRD.1_8_10              | 94.87  | 2.E-08  |
| Osc10802DRAFT_Contig7.7_32_195       | 96.88  | 1.E-06  |
| NC_010480_1_36                       | 89.47  | 3.E-09  |
| NC_010480_1_44                       | 89.47  | 3.E-09  |
| Contig210_18_30                      | 100.00 | 3.E-07  |
| Ple7327_Contig355.1_5_31             | 92.68  | 4.E-07  |
| Cepi9333_unknown1_1_32               | 97.30  | 7.E-08  |
| Mic7126DRAFT_MPQ.3_15_12             | 94.44  | 1.E-06  |
| AP011615_15_5                        | 100.00 | 3.E-07  |
| Contig86_12_49                       | 100.00 | 9.E-07  |
| MICAP_embl_AM778913_AM778913.73_1_65 | 100.00 | 1.E-12  |
| Csp6303_Contig662_2_6                | 100.00 | 6.E-08  |
| LepboDRAFT LPC.2 2 24                | 97.14  | 2.E-08  |

| Spacer Name           | ID (%) | E-value |
|-----------------------|--------|---------|
| NC_010480_1_36        | 89.47  | 6.E-09  |
| NC_010480_1_44        | 89.47  | 6.E-09  |
| NC_007776_1_3         | 97.06  | 1.E-07  |
| NC_007775_7_1         | 100.00 | 9.E-12  |
| NC_007775_9_9         | 99.91  | 0.E+00  |
| NC_007776_5_1         | 100.00 | 9.E-12  |
| NC_007775_7_16        | 100.00 | 6.E-13  |
| NC_007775_7_15        | 100.00 | 2.E-13  |
| NC_007775_7_14        | 100.00 | 1.E-10  |
| NC_007775_7_13        | 97.67  | 8.E-13  |
| NC_007775_2_33        | 100.00 | 2.E-07  |
| Csp6303_Contig662_2_6 | 100.00 | 1.E-07  |
| NC_003272_13_8        | 97.44  | 1.E-09  |
| NZ_DS989880_1_19      | 89.05  | 2.E-115 |



|                              |        |        |
|------------------------------|--------|--------|
| NZ_DS989846_5_9              | 100.00 | 3.E-07 |
| NZ_DS989846_5_5              | 91.07  | 7.E-11 |
| NZ_DS989846_4_1              | 89.29  | 2.E-08 |
| NZ_DS989846_5_7              | 96.23  | 3.E-16 |
| NZ_DS989846_5_3              | 91.07  | 7.E-11 |
| NZ_DS989846_5_2              | 92.86  | 3.E-13 |
| NZ_DS989846_4_2              | 88.79  | 3.E-24 |
| NZ_DS989846_4_3              | 88.68  | 1.E-06 |
| NZ_DS989846_4_4              | 91.30  | 3.E-07 |
| NZ_DS989861_1_5              | 86.14  | 2.E-32 |
| Gei7105DRAFT_GPC.5_13_3      | 97.50  | 2.E-09 |
| NZ_DS989846_5_4              | 96.17  | 3.E-94 |
| NZ_DS989846_5_6              | 92.45  | 2.E-11 |
| NZ_DS989846_5_8              | 92.86  | 3.E-13 |
| NZ_ACYA01000074_1_25         | 83.17  | 2.E-07 |
| Osc10802DRAFT_Contig7.7_15_8 | 95.35  | 1.E-08 |
| Nsp7107_Contig281_23_21      | 96.97  | 5.E-07 |
| Contig652_3_2                | 100.00 | 3.E-09 |
| Osc10802DRAFT_Contig7.7_30_3 | 81.75  | 6.E-10 |
| Mic7126DRAFT_MPQ.3_8_30      | 97.22  | 8.E-09 |
| Lepto7104DRAFT_LPD.1_4_4     | 90.32  | 2.E-10 |
| NZ_ACYA01000074_1_33         | 94.59  | 6.E-07 |
| NC_011880_2_6                | 91.67  | 4.E-26 |
| Contig115_2_44               | 95.29  | 4.E-29 |

| Spacer Name   | ID (%) | E-value |
|---------------|--------|---------|
| NC_007775_4_1 | 100.00 | 7.E-08  |

|                         |        |        |
|-------------------------|--------|--------|
| Gei7105DRAFT_GPC.5_13_3 | 91.67  | 1.E-06 |
| Csp6303_Contig662_2_6   | 100.00 | 1.E-06 |

| <b>Spacer Name</b>       | <b>ID (%)</b> | <b>E-value</b> |
|--------------------------|---------------|----------------|
| Contig115_2_44           | 84.80         | 6.E-19         |
| Nos7524_Contig213.1_2_35 | 95.12         | 2.E-10         |
| Nsp7107_Contig281_11_20  | 79.31         | 7.E-22         |
| Nsp7107_Contig281_23_2   | 88.52         | 1.E-08         |
| NZ_DS989880_1_19         | 93.48         | 1.E-06         |
| Lepto7104DRAFT_LPD.1_4_4 | 90.74         | 3.E-09         |
| NC_011726_8_1            | 100.00        | 1.E-15         |
| Cal7103DRAFT_CPM.6_4_3   | 84.21         | 2.E-08         |
| Contig86_8_78            | 100.00        | 8.E-13         |
| Contig652_3_2            | 100.00        | 6.E-20         |
